# Supplementary material
Source: PubMed Central journal article supplement (PMC6855099)
Supplement: baADV2019000569-suppl1.pdf [file baADV2019000569-suppl1.pdf]

### **Dependent Variable: Career Plans**

**At this point in your fellowship training, which of the following best describes your intended focus post fellowship?**

- Solid tumor oncology
- Malignant hematology
- Benign hematology
- Solid tumor oncology and malignant hematology
- Malignant and benign hematology
- Solid tumor oncology, malignant hematology, and benign hematology
- Don't know/undecided

### **Medical School Experiences**

**During medical school, did you have any clinical exposure to hematology/oncology? (select all that apply)**

- I took an elective combined hematology/oncology clerkship
- I took an elective hematology only clerkship
- I took an elective oncology only clerkship
- My internal medicine and/or pediatrics clerkship included a hematology/oncology rotation
- Other, please describe
- No, I did not have any specific clinical exposure to hematology/oncology

### **Residency Experiences**

**Please rate your level of agreement with the following statements related to your internal medicine residency training: (strongly agree, agree, neutral, disagree, strongly disagree)**

- A hematologist encouraged me to consider a career in hematology
- I had a clear vision of the career track for becoming a hematologist

### **Fellowship Experiences**

**How would you describe your fellowship program director's clinical/research focus? (select all that apply)**

- Solid tumor oncology
- Malignant hematology
- Benign hematology

**In your current year of fellowship, approximately what percent of clinical time is allocated to the following program areas? (must add up to 100%)**

- Solid tumor oncology
- Malignant hematology
- Benign hematology

**In your current year of fellowship, do you see any of the following? (check all that apply)**

- Outpatient solid tumor oncology patients
- Outpatient malignant hematology patients
- Outpatient benign hematology patients

**During your fellowship program, did you experience or observe any of the following related to hematology or oncology?** *(answered separately for solid tumor oncology, malignant hematology & benign hematology)*

Positive

- Large number/variety of intellectually interesting cases
- Team-based care (collaboration with NPs, PAs, etc.)
- Strong long-term doctor patient relationships
- Providers with good work life balance
- Faculty for whom their specialty was a calling
- Faculty who encouraged you toward a career in the specialty

Negative

- Frequent need to come to hospital for overnight
- Providers experiencing burnout
- Fellows (including yourself) experiencing burnout
- Faculty who discouraged you from a career in the specialty

**During your fellowship, did you experience any of the following related to hematology or oncology?** *(select all that apply—answered separately for solid tumor oncology, malignant hematology & benign hematology)*

- Participated in a research project
- Attended a research/professional meeting

Mentorship Experiences

**Did you have a hematology or oncology mentor that had a significant impact on your career choices during medical school, residency, and/or fellowship?** *(select all that apply—answered separately for solid tumor oncology, malignant hematology & benign hematology)*

- Medical school
- Residency
- Fellowship

**How did you interact with your mentor(s)?** *(select all that apply—answered separately for solid tumor oncology, malignant hematology & benign hematology)*

Research Opportunities

- Co-authored a paper together
- Participated in a research project together

Personal Connections

- Invited me for coffee, lunch, etc.
- Rounded on patients with me outside of formal training curriculum

Networking

- Introduced me to influential practitioners
- Helped me attend conferences
- Invited me to give presentations at meetings/conferences

### Coaching and Career Advice

- Helped me make decisions about my career path
- Suggested positions to apply for
- Helped me prep for interviews

### Control Variables

#### **In which year of your fellowship are you?**

- 1st year
- 2nd year
- 3rd year
- 4th year or beyond

#### **When did you start seriously considering hematology as a career option?** *(fellows who indicate malignant and/or benign hematology career plans)*

- Before medical school
- During medical school
- During residency
- During fellowship
- After practicing in a different area of medicine
- Other

#### **What is your gender?** *(select one)*

- Male
- Female
- Prefer to self-describe
- Decline to answer

#### **What is your age?**

- Years

#### **What is your race?** *(select all that apply)*

- American Indian/Alaska Native
- Asian or Pacific Islander
- Black/African American
- White
- Other (please specify)
- Decline to answer

#### **Are you Hispanic/Latino?**

- Yes
- No

#### **Where did you attend medical school?**

- U.S.
- Canada
- Other country

**Supplemental Table. Logistic regression models of associations between training & mentorship experiences and hematology/oncology fellows' plans to enter careers including any hematology**

| Variable                                                                                   | Model #1<br>(1 <sup>st</sup> & 2 <sup>nd</sup> year<br>fellows, n=386) | Model #2 (all<br>fellows, n=626)           |
|--------------------------------------------------------------------------------------------|------------------------------------------------------------------------|--------------------------------------------|
|                                                                                            | Odds Ratio<br>[95% confidence<br>interval]                             | Odds Ratio<br>[95% confidence<br>interval] |
| <i>Medical School</i><br>Elective hematology or hematology/oncology clerkship              | 0.83<br>[0.48-1.43]                                                    |                                            |
| Hematology/oncology rotation in internal<br>medicine/pediatrics clerkship                  | 1.13<br>[0.63-2.02]                                                    |                                            |
| <i>Residency</i><br>Encouraged to pursue hematology career (somewhat or<br>strongly agree) | 1.57<br>[0.87-2.83]                                                    |                                            |
| Had clear vision of hematology career path (somewhat or<br>strongly agree)                 | 2.53**<br>[1.43-4.49]                                                  |                                            |
| <i>Fellowship</i><br>Program director hematology clinical and/or research focus            | 1.37<br>[0.80-2.37]                                                    | 1.22<br>[0.81-1.85]                        |
| Hematology outpatients                                                                     | 4.56**<br>[1.56-13.36]                                                 | 6.55**<br>[2.89-14.84]                     |
| High hematology patient care time (>median for all fellows)                                | 2.20**<br>[1.26-3.84]                                                  | 1.98**<br>[1.28-3.06]                      |
| Positive hematology experience index                                                       | 0.87<br>[0.71-1.06]                                                    | 0.90<br>[0.77-1.04]                        |
| Negative hematology experience index                                                       | 0.76*<br>[0.58-1.00]                                                   | 0.81*<br>[0.67-0.99]                       |
| Hematology research experiences                                                            | 4.08**<br>[2.20-7.55]                                                  | 3.28**<br>[2.03-5.31]                      |
| <i>Mentorship</i><br>Hematology mentorship—research                                        | 1.81<br>[0.88-3.75]                                                    | 1.69<br>[0.97-2.97]                        |
| Hematology mentorship—personal                                                             | 0.48                                                                   | 0.76                                       |

|                                              |                       |                       |
|----------------------------------------------|-----------------------|-----------------------|
|                                              | [0.22-1.08]           | [0.43-1.36]           |
| Hematology mentorship—networking             | 1.73<br>[0.77-3.90]   | 2.57**<br>[1.38-4.80] |
| Hematology mentorship—coaching               | 3.12**<br>[1.47-6.64] | 2.48**<br>[1.39-4.44] |
| <i>Control Variables</i>                     |                       |                       |
| Hematology interest before medical school    | 0.43<br>[0.14-1.30]   | 0.48<br>[0.18-1.28]   |
| First-year fellow                            | 0.94<br>[0.54-1.64]   | 0.86<br>[0.50-1.47]   |
| Second-year fellow                           | —                     | 0.94<br>[0.57-1.54]   |
| Age                                          | 0.98<br>[0.90-1.07]   | 1.01<br>[0.94-1.09]   |
| Female (vs. male)                            | 0.57*<br>[0.33-0.99]  | 0.55**<br>[0.36-0.83] |
| Underrepresented (black/AA, AI/AN, Hispanic) | 1.94<br>[0.72-5.21]   | 1.50<br>[0.72-3.15]   |
| International medical graduate               | 1.14<br>[0.65-2.02]   | 0.85<br>[0.55-1.31]   |

\*p<0.05, \*\*p<0.01
